# Supplementary material for: Heritability of Regional Brain Volumes in Large-Scale Neuroimaging and Genetic Studies
Source: Oxford University Press journal article supplement (doi:10.1093/cercor/bhy157), 2018-07-02
Supplement: supplementary_data_bhy157.zip [file supplementary_data_bhy157.zip]

Archive with 2 entries (2 files):
- bhy157_GCTA_CC_Dataset_V3.doc
- bhy157_GCTA_CC_SD_V3.pdf
